# Supplementary material
Source: HighWire-hosted journal article supplement (https://www.highwirestage.com/highwire/filestream/96931/field_highwire_adjunct_files/0/1035.pdf)
Supplement: 1035.pdf [file 1035.pdf]

## SUPPLEMENTARY MATERIAL

### Search

Last search performed on the 1th of October 2021.

Pubmed:

*((mammillary bodies) OR (mammillary body)) AND ((pediatric) OR (child) OR (children) OR (infant) OR (neonatal) OR (adolescent)) AND ((MRI) OR (radiology) OR (T2) OR (DWI)))*

Alternative spelling and variation of the words are automatically included by the pubmed search engine

Embase:

*('mammillary bodies'/exp OR 'mammillary bodies' OR (mammillary AND bodies) OR 'mammillary body'/exp OR 'mammillary body' OR (mammillary AND ('body'/exp OR body))) AND ('pediatric'/exp OR pediatric OR 'child'/exp OR child OR 'children'/exp OR children OR 'infant'/exp OR infant OR neonatal OR 'adolescent'/exp OR adolescent) AND ('mri'/exp OR mri OR 'radiology'/exp OR radiology OR t2 OR dwi).*

Flow-diagram showing the search and assessment of studies included

## Flow Diagram

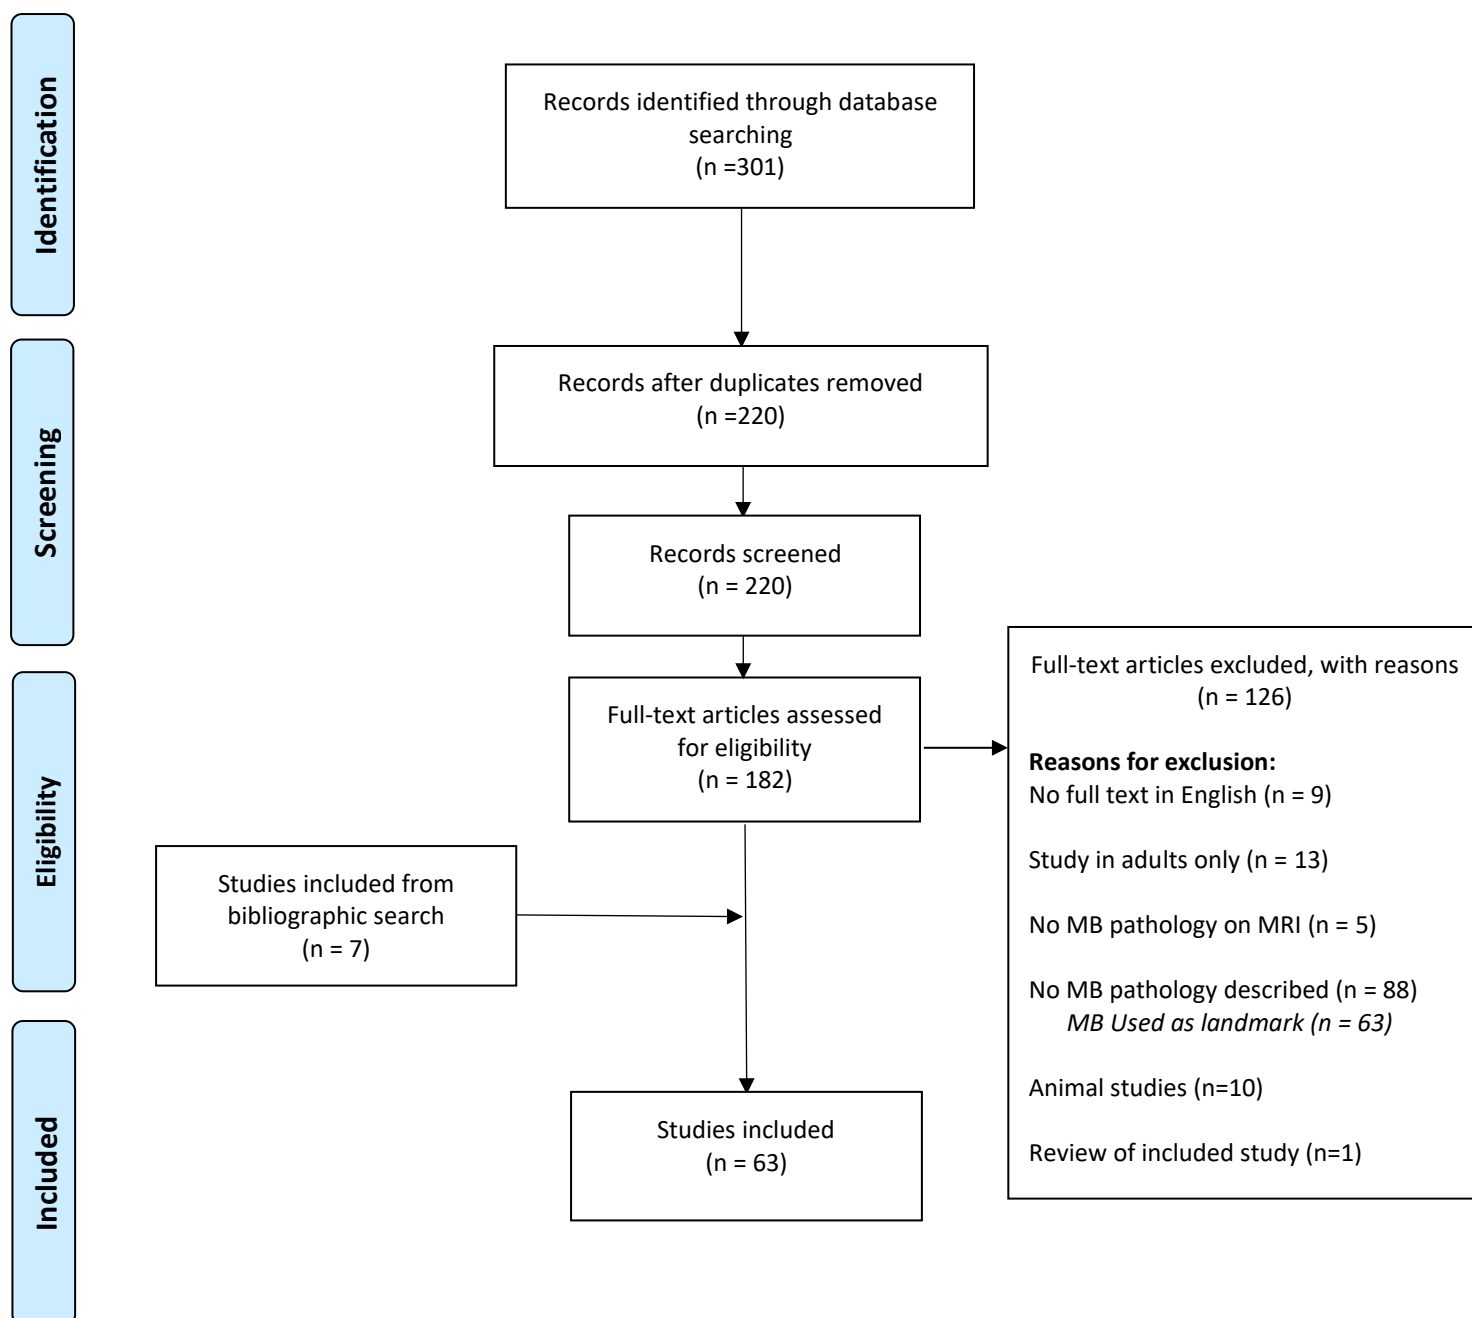

Overview of included articles arranged by underlying condition and age of (youngest) patient

| Author<br>Year                             | Study<br>design | Number of<br>participants               | Age of<br>participants | Condition                | Type of MB pathology on MRI<br><i>Other relevant outcomes (?)</i>                                                                                                      | Lowest slice<br>thickness used |
|--------------------------------------------|-----------------|-----------------------------------------|------------------------|--------------------------|------------------------------------------------------------------------------------------------------------------------------------------------------------------------|--------------------------------|
| Wani et al. (2016) <sup>1</sup>            | RS              | 22 patients                             | 45 days – 8 months     | Thiamine deficiency (WE) | Hyperintense signal on T2 weighted imaging in 1                                                                                                                        | 4 mm. Interslice gap: 1 mm     |
| Kornreich et al. (2005) <sup>2</sup>       | RS              | 6 patients                              | 2-10 months            | Thiamine deficiency      | T2-weighted images showed hyperintensity of the MBs in 5 patients<br>On follow up: atrophy of the MBs in three patients                                                | Unknown                        |
| Fattal-Valevski et al. (2005) <sup>3</sup> | RS              | 9 patients                              | 2.5-12 months          | Thiamine deficiency (WE) | T2 hyperintense MBs in 1 patient<br>MRI findings improved 5 weeks later                                                                                                | Unknown                        |
| Gliebus et al. (2014) <sup>4</sup>         | CR              | 1 patient                               | 19 months              | Thiamine deficiency (WE) | Restriction of diffusion in MBs with increased signal on T2-weighted and FLAIR images<br>Follow up 1.5 months later, showed a marked improvement of the signal changes | Unknown                        |
| Oka et al. (2001) <sup>5</sup>             | CR              | 1 patient                               | 3                      | Thiamine deficiency (WE) | T2 hyperintense MBs<br>Follow-up MR examination after 1 month demonstrated complete resolution                                                                         | Unknown                        |
| Darlington et al. (2015) <sup>6</sup>      | CR              | 1 patient                               | 5                      | Thiamine deficiency (WE) | Bilateral enhancement MBs                                                                                                                                              | Unknown                        |
| Zuccoli et al. (2007) <sup>7</sup>         | RS              | 26 patients<br>13 no alcohol abuse (NA) | 6-81 (mean 46.6 ± 19)  | Thiamine deficiency (WE) | Symmetric lesions in MBs in 58% (in NA patients 38%)<br><i>Contrast enhancement of MB statistically positively correlated with alcohol abuse group</i>                 | Unknown                        |
| Zuccoli et al (2009) <sup>8</sup>          | RS              | 56 patients                             | 6 – 88 (50.3 ± 17)     | Thiamine deficiency (WE) | Evidence of symmetric lesions in the MBs (45%)<br><i>MB contrast enhancement was significantly associated with alcohol abuse</i>                                       | Unknown                        |
| Srivastava et al. (2012) <sup>9</sup>      | PS              | 11 patients<br>8 controls               | 7.8 ± 2.7<br>8.8 ± 2.5 | Thiamine deficiency      | MBs significantly smaller in patients<br>At follow up MB volume significantly improved                                                                                 | 3 mm                           |
| Vasconcelos et al. (1999) <sup>10</sup>    | Review of CRs   | 31 patients (8 with MRI)                | 11 ± 6.5               | Thiamine deficiency (WE) | Increased signal in T2-weighted images and contrast enhancement of MB in all 8                                                                                         | Unknown                        |

|                                            |    |                            |                    |                          |                                                                                                                                                                                               |                                                                |
|--------------------------------------------|----|----------------------------|--------------------|--------------------------|-----------------------------------------------------------------------------------------------------------------------------------------------------------------------------------------------|----------------------------------------------------------------|
| Harter et al. (1995) <sup>11</sup>         | CR | 1 patient                  | 11                 | Thiamine deficiency (WE) | MB enhancement on postcontrast examination                                                                                                                                                    | Unknown                                                        |
| Cooke et al. (2006) <sup>12</sup>          | CR | 1 patient                  | 11                 | Thiamine deficiency      | Typical midline increased signal intensity in the dorsal mid-brain, thalami, and MBs on FLAIR imaging                                                                                         | Unknown                                                        |
| Sparacia et al. (1999) <sup>13</sup>       | CR | 1 patient                  | 12                 | Thiamine deficiency (WE) | Intense enhancement of the MBs<br>Follow-up 1 month later: no signal abnormalities were found nor was there MB atrophy                                                                        | Unknown                                                        |
| Gupta et al. (2012) <sup>14</sup>          | PS | 10 patients<br>11 controls | 15 ± 11<br>40 ± 12 | Thiamine deficiency      | MB volume changes are primarily a consequence of thiamine deficiency, which may secondarily result in microstructural changes in the fornix                                                   | 1 mm                                                           |
| Lamdhade et al. (2013) <sup>15</sup>       | CR | 1 patient                  | 16                 | Thiamine deficiency      | Gadolinium enhancement of MBs and vermis                                                                                                                                                      | Unknown                                                        |
| Liu et al. (2006) <sup>16</sup>            | CR | 1 patient                  | 16                 | Thiamine deficiency (WE) | Gadolinium enhancement on day 5 in the right MB, this had not been found on the initial MRIs.<br><i>PA: focal hemorrhage, edema and hypertrophy of the endothelial cells of the right MB.</i> | Unknown                                                        |
| Arana-Guajardo et al. (2012) <sup>17</sup> | CR | 1 patient                  | 17                 | Thiamine deficiency (WE) | Hyperintense signals in MBs on T2 FLAIR images                                                                                                                                                | Unknown                                                        |
| Samanta et al. (2015) <sup>18</sup>        | CR | 1 patient                  | 17                 | Thiamine deficiency (WE) | abnormal T2 prolongation and restrictive diffusivity of bilateral MBs                                                                                                                         | Unknown                                                        |
| Renthal et al. (2014) <sup>19</sup>        | CR | 1 patient                  | 'adolescent'       | Thiamine deficiency      | Symmetric abnormal T2 prolongation of the mammillary bodies                                                                                                                                   | Unknown                                                        |
| Lyons et al. (2016) <sup>20</sup>          | CR | 1 patient                  | 18                 | Thiamine deficiency (WE) | symmetric signal T2 hyperintensity and restricted diffusion in het MBs                                                                                                                        | Unknown                                                        |
| Khalsa et al. (2016) <sup>21</sup>         | RS | 32 patients<br>30 controls | 19.4 ± 7.3         | Thiamine deficiency      | Significantly smaller MB volumes in underweight group. Weight-restored group exhibited significantly larger MB volumes.                                                                       | Oversampled to a resolution of 0.2 x 0.2 x 0.2 mm <sup>3</sup> |
| Fei et al. (2008) <sup>22</sup>            | RS | 12 patients                | 43.9 (16-69)       | Thiamine deficiency (WE) | Gadolinium enhancement of MB in 2 of 3 patients.<br>No atrophy of MB                                                                                                                          | Unknown                                                        |

|                                          |    |                            |                                     |                          |                                                                                                                                                                                                                           |                                  |
|------------------------------------------|----|----------------------------|-------------------------------------|--------------------------|---------------------------------------------------------------------------------------------------------------------------------------------------------------------------------------------------------------------------|----------------------------------|
| Zuccoli et al. (2010) <sup>23</sup>      | R  | 23 patients in 17 articles | Unknown                             | Thiamine deficiency (WE) | 16/23 cases showed bilateral alterations in the thalamus (70%), 13 in the periaqueductal region (57%), 11 in the MBs (47%) and three in the tectal plate (13%).                                                           | Unknown                          |
| Lallas et al. (2014) <sup>24</sup>       | R  | Unknown                    | Unknown                             | Thiamine deficiency (WE) | Common findings include symmetric T2 hyperintensities in dorsal medial thalamus, MBs, periaqueductal gray matter, and tectal plate.                                                                                       | Unknown                          |
| Zuccoli et al. (2009) <sup>25</sup>      | R  | 40 patients In 16 articles | Unknown (Pediatric and adult cases) | Thiamine deficiency (WE) | Contrast enhancement of the MB may be the only sign of WE                                                                                                                                                                 | Unknown                          |
|                                          |    |                            |                                     |                          |                                                                                                                                                                                                                           |                                  |
| Annink et al. (2021) <sup>26</sup>       | RS | 50 (22 HT and 28 non-HT)   | 3-8 days + FU 10 years              | HIE                      | At 10 years of age, MB atrophy was present in 17% in the non-HT group and 50% in the HT group                                                                                                                             | 0.8 mm                           |
| Molavi et al. (2019) <sup>27</sup>       | RS | 235                        | 3-10 days                           | HIE                      | abnormal high signal on T2-weighted sequences (13.2%) restricted diffusion (2,5%) atrophy at FU (89%) (in 9 patients)                                                                                                     | 2 mm                             |
| Lequin et al. (2021) <sup>28</sup>       | RS | 231                        | < 2 weeks                           | HIE                      | abnormal T2 signal intensity with swelling (41%) atrophy at FU (44%) (in 18 patients with abnormal MBs)                                                                                                                   | Netherlands 1 mm<br>Genoa 2-3 mm |
| Bindshaedler et al. (2011) <sup>29</sup> | CR | 1                          | 8                                   | HIE                      | Severe bilateral sclerosis of the hippocampal formation as well as atrophy of the fornix and MBs                                                                                                                          | 1.2 mm                           |
| Geva et al. (2020) <sup>30</sup>         | DS | 20 patients 17 controls    | 14.05 ± 3.86<br>16.24 ± 7.05        | HIE                      | MB small in 50% of patients<br><i>Movement coordination deficit affecting the hand and the wrist in patients exposed to early hypoxic-ischaemic brain injury may be related to reduced volumes of the caudate nucleus</i> | 1 mm                             |
| Dzieciol et al. (2017) <sup>31</sup>     | RS | 18 DA<br>18 controls       | 20 (11-35)<br>19 (10-35)            | HIE                      | Atrophy in DA group (67%)<br>No Atrophy in controls (0%)<br><i>Associated with memory loss</i>                                                                                                                            | 1 mm                             |
|                                          |    |                            |                                     |                          |                                                                                                                                                                                                                           |                                  |
| Kumar et al. (2009) <sup>32</sup>        | RS | 14 CCHS<br>31 controls     | 15.1 ± 2.3<br>15.1 ± 2.4            | CCHS                     | Significant reduced volume in CCHS compared to controls                                                                                                                                                                   | 1 mm                             |
|                                          |    |                            |                                     |                          |                                                                                                                                                                                                                           |                                  |

|                                           |     |                                           |                          |        |                                                                                                                                                                                                                                                                                                                                              |                                                                |
|-------------------------------------------|-----|-------------------------------------------|--------------------------|--------|----------------------------------------------------------------------------------------------------------------------------------------------------------------------------------------------------------------------------------------------------------------------------------------------------------------------------------------------|----------------------------------------------------------------|
| Cabrera-Mino et al. (2020) <sup>33</sup>  | RS  | 25 SVHD<br>38 controls                    | 15.9 ± 1.2<br>16.0 ± 1.1 | SVHD   | Significant volume reduction in SVHD compared to controls (100%)<br><i>Significant lower MoCA and WRAML2 scores in SVHD over controls</i>                                                                                                                                                                                                    | 0.9 mm (resampled to voxel size 0.2 x 0.2 x 0.2 mm for volume) |
| Singh et al. (2019) <sup>34</sup>         | RS  | 27 SVHD<br>35 controls                    | 15.7 ± 1.2<br>15.9 ± 1.2 | SVHD   | Tissue injury (increased AD, RD and MD values) in SVHD compared to controls                                                                                                                                                                                                                                                                  | 0.9 mm                                                         |
|                                           |     |                                           |                          |        |                                                                                                                                                                                                                                                                                                                                              |                                                                |
| Muller et al. (2011) <sup>35</sup>        | PS  | 120 patients                              | 1.2 - 18                 | Masses | Surgical treatment of craniopharyngioma affects rather radical increase in BMI during the post-surgical 36-month period, especially hypothalamic involvement/lesion of the anterior and posterior hypothalamic area, i.e. involving the MBs and the area beyond MBs, with consequential severely lower QoL scores for social function family | Unknown                                                        |
| Freeman et al. (2004) <sup>36</sup>       | RS  | 72 patients                               | 22 months – 31 years     | Masses | Displacement or distortion of MB was unilateral in 68% and bilateral in 19%.<br>In 10 patients MB could be identified only unilaterally<br><i>The intimate relationship to the MB, fornix, and mammillothalamic tract suggests a role for these structures in epileptogenesis associated with hypothalamic hamartomas.</i>                   | 2.5 mm; intersection gap 0.1 mm                                |
| Vanslambrouck et al. (2000) <sup>37</sup> | CR  | 1 patient                                 | 5                        | Masses | Dolicho-ectasia of the left posterior cerebral artery and internal carotid artery with compression of the brainstem, MBs and the optic tract.                                                                                                                                                                                                | Unknown                                                        |
| Roth et al. (2015) <sup>38</sup>          | RS  | 45 patients (22 with HO<br>23 without HO) | Mean 13.9                | Masses | Subjects who developed hypothalamic obesity (HO) showed more frequently lesions affecting the third ventricular floor, MBs, and anterior, medial (all <0.05), and most importantly posterior hypothalamus (P < 0.01).                                                                                                                        | Unknown                                                        |
| Perez et al. (2021) <sup>39</sup>         | RCT | 35 patients:<br>- 20 ExQW<br>- 15 placebo | 16.9 ± 4,7<br>16.9 ± 4,3 | Masses | MB intact in only 22% of the patients<br>Greater MB injury associated with greater reductions in adiposity following GLP-1RA treatment                                                                                                                                                                                                       | 1 mm                                                           |

|                                           |    |                                              |                                   |                   |                                                                                                                                                                                                                                                                                                                                             |         |
|-------------------------------------------|----|----------------------------------------------|-----------------------------------|-------------------|---------------------------------------------------------------------------------------------------------------------------------------------------------------------------------------------------------------------------------------------------------------------------------------------------------------------------------------------|---------|
| 125 Ozyurt et al. (2014) <sup>40</sup>    | PS | 15 patients<br>24 controls                   | Median:<br>17.3 (6)<br>17.6 (4.8) | Masses            | 4 / 5 patients with delayed-recall performance in the clinical range had postoperative hypothalamic lesions involving MBs<br>owing to afferent and efferent projections, injury of the hypothalamus, including MBs, might lead to not only medial temporal and subcortical dysfunction, but also to frontal dysfunction, through diaschisis | Unknown |
| 122 Mortini et al. (2016) <sup>41</sup>   | RS | 47 patients:<br>- 10 children<br>- 37 adults | 34 ± 2<br>11 ± 1<br>41 ± 2        | Masses            | Excluding age, no significant differences between childhood and adult cases were observed for any of the variables.<br>Hypothalamic syndrome was associated with the degree of MB involvement                                                                                                                                               | Unknown |
| 130 Goncalves et al. (2014) <sup>42</sup> | CR | 1 patient                                    | 9                                 | Encephalitis      | increased T2 and FLAIR signal in the MBs                                                                                                                                                                                                                                                                                                    | Unknown |
| 91 Poloni et al. (2009) <sup>43</sup>     | CR | 1 patient                                    | 3 months                          | Metabolic disease | Contrast enhancement of the MBs                                                                                                                                                                                                                                                                                                             | Unknown |
| 93 Shah et al. (2020) <sup>44</sup>       | CR | 2 patients                                   | 26 months<br>21 months            | Metabolic disease | bilateral symmetric optic neuritis and T2 hyperintensity of bilateral MBs, dorsal aspect of medulla and the area postrema                                                                                                                                                                                                                   | Unknown |
| 90 Friederich (2020) <sup>45</sup>        | CR | 2 patients                                   | 4 & 8                             | Metabolic disease | Diffusion restriction in the posterior part of the hippocampi medial left temporal lobe, posterior inferior thalamus and the MBs in Leigh disease                                                                                                                                                                                           | Unknown |
| 92 Inui et al. (2000) <sup>46</sup>       | CR | 1 patient                                    | 13                                | Metabolic disease | Low intensity of the MB on T2                                                                                                                                                                                                                                                                                                               | Unknown |
| 95 Oikawa et al. (2001) <sup>47</sup>     | RS | 15 patients                                  | 1-28                              | Epilepsy          | Atrophy and/or signal change of the MB in 3 (20%) all accompanied by hippocampal and parahippocampal atrophy. <i>Patients with abnormalities of the circuit of Papez did not have more severe epilepsy than those without</i>                                                                                                               | 1.3 mm  |

|                                       |    |                              |                        |          |                                                                                                                                                                                                                                                     |                |
|---------------------------------------|----|------------------------------|------------------------|----------|-----------------------------------------------------------------------------------------------------------------------------------------------------------------------------------------------------------------------------------------------------|----------------|
| Tschampa et al. (2011) <sup>48</sup>  | RS | 43 patients                  | 2 – 79                 | Epilepsy | 20 patients showed hyperintense pulvinar lesions; 4/20 showed atrophy of the MB and fornix (3 ipsilateral, 1 contralateral)<br>5 patients showed linear defects in the anterior thalamus; there was ipsilateral atrophy of the MB and fornix in all | Unknown        |
| Kodama et al. (2003) <sup>49</sup>    | RS | 34 patients                  | 3 - 54<br>(mean 28.6)  | Epilepsy | Atrophy of the fornix (14.7%), MB's (17.6%), mamillothalamic tract (8.8%), and thalamus ipsilateral to the epileptic focus (11.8%) in patients with temporal lobe epilepsy                                                                          | Unknown        |
| Urbach et al. (2005) <sup>50</sup>    | PS | 45 patients<br>15 controls   | 3 - 66<br>18 - 54      | Epilepsy | MB volumes were significantly smaller on the operated-on than on the non-operated-on side and significantly smaller in patients compared with controls. No volume differences of the MBs existed between seizure-free and non-seizure-free patients | 1.1 mm         |
| Ferreira et al. (2003) <sup>51</sup>  | RS | 115 patients                 | 3.5 - 80               | Epilepsy | MB volume loss in 5 (11.6%)                                                                                                                                                                                                                         | Unknown        |
| Mamourian et al. (1993) <sup>52</sup> | CR | 3 cases: 1 pediatric         | 4.5                    | Epilepsy | There was no parenchymal abnormality seen within the temporal or parietal lobes. However, the scan showed absence of the right MB                                                                                                                   | 5 mm           |
| Ng et al. (1997) <sup>53</sup>        | PS | 27 patients<br>10 controls   | 6 - 51<br>23 - 67      | Epilepsy | In 19 cases there was unilateral abnormality in the hippocampus (HC); there was a smaller MB on the same side as the abnormal HC in all 19 cases.<br><i>Smaller fornix in 18 / 19 cases</i>                                                         | 2 mm           |
| Ozturk et al. (2008) <sup>54</sup>    | RS | 178 patients<br>353 controls | 36 (8-69)<br>49 (7-87) | Epilepsy | Asymmetrical MBs in group with seizures (14%) and without seizures (6.5%)                                                                                                                                                                           | 4-5 mm         |
| Hakyemez et al. (2006) <sup>55</sup>  | PS | 32 patients<br>42 controls   | 10 – 67<br>13 – 62     | Epilepsy | There was a significant difference in volume of fornix and MBs of the patients versus control subjects ( $p < 0.005$ )<br>MBs were abnormal in 37% of patients with bilateral involvement in 15%.                                                   | 3 mm; gap 1 mm |



|                                        |    |                                                                             |                               |            |                                                                                                                                                                                                                                                                                                                     |                 |
|----------------------------------------|----|-----------------------------------------------------------------------------|-------------------------------|------------|---------------------------------------------------------------------------------------------------------------------------------------------------------------------------------------------------------------------------------------------------------------------------------------------------------------------|-----------------|
| Kim et al. (1995) <sup>56</sup>        | RS | 40 patients<br>34 controls                                                  | 13-57<br>14-56                | Epilepsy   | Asymmetrically small MB was found in 3% (1 of 33) of the presurgical hippocampal sclerosis group and in 57% (4 of 7) of the postsurgical hippocampal sclerosis group, all 4 accompanied by asymmetrically small fornix on the same side<br>In the control group none of the subjects had asymmetrically small MBs   | 2-3 mm          |
| Kuzniecky et al. (1999) <sup>57</sup>  | PS | 50 temporal lobe epilepsy<br>10 extra-temporal lobe epilepsy<br>17 controls | 17 – 42<br>Mean 30<br>24 - 41 | Epilepsy   | MB volumetric measurements indicated that 34 (41%) patients with MTLE (Group 1) had evidence of atrophy. Conversely, no patient with extratemporal lobe epilepsy had atrophy of these structures.                                                                                                                   | 1.5 mm; no gaps |
| Grewal et al. (2018) <sup>58</sup>     | RS | 20 patients                                                                 | 17-66                         | Epilepsy   | Mammillary body volume decline after LiTT is associated with better seizure outcomes (average volume reduction of 34.6% in the ipsilateral mammillary body after successful (seizure freedom at 1 year) amygdalo-hippocampal LiTT versus an average decline of only 8.4% in patients with poor outcomes after LiTT. | 1 mm            |
| Ciesielski et al. (1999) <sup>59</sup> | PS | 10 patients<br>10 controls                                                  | 6.8 – 13.5<br>6 - 13          | Iatrogenic | Significant reductions in volumetric measures for bilateral MBs in patients compared to controls, significant reductions in prefrontal cortical volume, visual and verbal single-trial memory deficits, and visuospatial, but not verbal, multitrial learning deficits.                                             | 1 mm; no gap    |
| Kwan et al. (2015) <sup>60</sup>       | CR | 1 patient                                                                   | 16                            | Iatrogenic | Clinical and imaging findings suggest that extra-ventricular Ommaya catheter position may lead to a direct methotrexate-induced toxicity to the Papez circuit.<br>intense homogeneous enhancement of the MBs and corresponding hyperintensity in the MBs on T2-weighted images.                                     | Unknown         |
|                                        |    |                                                                             |                               |            |                                                                                                                                                                                                                                                                                                                     |                 |

|                                      |    |           |              |               |                                                                                                                                                                                                                                                                                                                                                                                                                    |         |
|--------------------------------------|----|-----------|--------------|---------------|--------------------------------------------------------------------------------------------------------------------------------------------------------------------------------------------------------------------------------------------------------------------------------------------------------------------------------------------------------------------------------------------------------------------|---------|
| Anand et al. (2015) <sup>61</sup>    | CR | 1 patient | 28 months    | Miscellaneous | Susceptibility within the MBs on T2 gradient echo imaging consistent with hemorrhagic necrosis in a patient with recurrent familial acute necrotizing encephalopathy (ANE1).                                                                                                                                                                                                                                       | Unknown |
| Herebian et al. (2017) <sup>62</sup> | CR | 1 patient | 6            | Miscellaneous | Global brain atrophy, hypointensities of globus pallidus, MBs, and cerebral peduncles, comparable to findings in neurodegeneration with brain iron accumulation disorders.                                                                                                                                                                                                                                         | Unknown |
| Assis et al. (2018) <sup>63</sup>    | CR | 1 patient | 'adolescent' | Miscellaneous | Small focus of encephalomalacia in the anteromedial aspect of the right thalamus, presumed chronic infarct, atrophy of the right MB and asymmetric volume loss of the retrocommissural fibers and anterior pillar of the right fornix. A small gliotic tract could be seen along the expected course of right mammillothalamic tract on a sagittal T1 reformatted image in a patient with complex partial seizures | Unknown |

## References

1. Wani NA, Qureshi UA, Jehangir M, Ahmad K, Ahmad W. Infantile encephalitic beriberi: magnetic resonance imaging findings. *Pediatric Radiology*. 2016;46(1):96-103.
2. Kornreich L, Bron-Harlev E, Hoffmann C, et al. Thiamine deficiency in infants: MR findings in the brain. *AJNR American journal of neuroradiology*. 2005;26(7):1668-1674.
3. Fattal-Valevski A, Kesler A, Sela BA, et al. Outbreak of life-threatening thiamine deficiency in infants in Israel caused by a defective soy-based formula. *Pediatrics*. 2005;115(2):e233-238.
4. Gliabus G, Faerber EN, Valencia I, Khurana DS, Singh SB, Legido A. Ataxia, ophthalmoplegia, and impairment of consciousness in a 19-month-old american boy. *Seminars in Pediatric Neurology*. 2014;21(2):139-143.
5. Oka M, Terae S, Kobayashi R, et al. Diffusion-weighted MR findings in a reversible case of acute Wernicke encephalopathy. *Acta Neurol Scand*. 2001;104(3):178-181.
6. Darlington WS, Pinto N, Hecktman HM, Cohn SL, Labelle JL. Stem Cell Transplant-Associated Wernicke Encephalopathy in a Patient with High-Risk Neuroblastoma. *Pediatric Blood and Cancer*. 2015;62(12):2232-2234.
7. Zuccoli G, Gallucci M, Capellades J, et al. Wernicke encephalopathy: MR findings at clinical presentation in twenty-six alcoholic and nonalcoholic patients. *AJNR American journal of neuroradiology*. 2007;28(7):1328-1331.
8. Zuccoli G, Santa Cruz D, Bertolini M, et al. MR imaging findings in 56 patients with Wernicke encephalopathy: nonalcoholics may differ from alcoholics. *AJNR American journal of neuroradiology*. 2009;30(1):171-176.
9. Srivastava A, Yadav SK, Borkar VV, et al. Serial evaluation of children with ALF with advanced MRI, serum proinflammatory cytokines, thiamine, and cognition assessment. *Journal of Pediatric Gastroenterology and Nutrition*. 2012;55(5):580-586.
10. Vasconcelos MM, Silva KP, Vidal G, Silva AF, Domingues RC, Berditchevsky CR. Early diagnosis of pediatric wernicke's encephalopathy. *Pediatric Neurology*. 1999;20(4):289-294.
11. Harter SB, Nokes SR. Gadolinium-enhanced MR findings in a pediatric case of Wernicke encephalopathy. *AJNR American journal of neuroradiology*. 1995;16(4):700-702.
12. Cooke CA, Hicks E, Page AB, Mc Kinstry S. An atypical presentation of Wernicke's encephalopathy in an 11-year-old child. *Eye (Lond)*. 2006;20(12):1418-1420.
13. Sparacia G, Banco A, Lagalla R. Reversible MRI abnormalities in an unusual paediatric presentation of Wernicke's encephalopathy. *Pediatric Radiology*. 1999;29(8):581-584.
14. Gupta RK, Yadav SK, Saraswat VA, et al. Thiamine deficiency related microstructural brain changes in acute and acute-on-chronic liver failure of non-alcoholic etiology. *Clin Nutr*. 2012;31(3):422-428.
15. Lamdhade S, Almulla A, Alroughani R. Recurrent Wernicke's encephalopathy in a 16 year-old girl with atypical clinical and radiological features. *J Neurol Sci*. 2013;333:e627.

16. Liu YT, Fuh JL, Lirng JF, Li AFY, Ho DMT, Wang SJ. Correlation of magnetic resonance images with neuropathology in acute Wernicke's encephalopathy. *Clin Neurol Neurosurg.* 2006;108(7):682-687.
17. Arana-Guajardo AC, Cámara-Lemmaroy CR, Rendón-Ramírez EJ, Jáquez-Quintana JO, Góngora-Rivera JF, Galarza-Delgado DA. Wernicke encephalopathy presenting in a patient with severe acute pancreatitis. *Jop.* 2012;13(1):104-107.
18. Samanta D. Dry beriberi preceded Wernicke encephalopathy: Thiamine deficiency after laparoscopic sleeve gastrectomy. *Journal of Pediatric Neurosciences.* 2015;10(3):297-299.
19. Renthall W, Marin-Valencia I, Evans PA. Thiamine deficiency secondary to anorexia nervosa: An uncommon cause of peripheral neuropathy and wernicke encephalopathy in adolescence. *Pediatric Neurology.* 2014;51(1):100-103.
20. Lyons DA, Linscott LL, Krueger DA. Non-alcoholic Wernicke Encephalopathy. *Pediatric Neurology.* 2016;56:94-95.
21. Khalsa SS, Kumar R, Patel V, Strober M, Feusner JD. Mammillary body volume abnormalities in anorexia nervosa. *Int J Eat Disord.* 2016;49(10):920-929.
22. Fei GQ, Zhong C, Jin L, et al. Clinical characteristics and MR imaging features of nonalcoholic Wernicke encephalopathy. *AJNR American journal of neuroradiology.* 2008;29(1):164-169.
23. Zuccoli G, Siddiqui N, Bailey A, Bartoletti SC. Neuroimaging findings in pediatric Wernicke encephalopathy: a review. *Neuroradiology.* 2010;52(6):523-529.
24. Lallas M, Desai J. Wernicke encephalopathy in children and adolescents. *World Journal of Pediatrics.* 2014;10(4):293-298.
25. Zuccoli G, Pipitone N. Neuroimaging findings in acute Wernicke's encephalopathy: review of the literature. *AJR Am J Roentgenol.* 2009;192(2):501-508.
26. Annink KV, de Vries LS, Groenendaal F, et al. Mammillary body atrophy and other MRI correlates of school-age outcome following neonatal hypoxic-ischemic encephalopathy. *Sci Rep.* 2021;11(1):5017.
27. Molavi M, Vann SD, de Vries LS, Groenendaal F, Lequin M. Signal Change in the Mammillary Bodies after Perinatal Asphyxia. *AJNR American journal of neuroradiology.* 2019;40(11):1829-1834.
28. Lequin MH, Steggerda SJ, Severino M, et al. Mammillary body injury in neonatal encephalopathy: a multicentre, retrospective study. *Pediatr Res.* 2021.
29. Bindschaedler C, Peter-Favre C, Maeder P, Hirsbrunner T, Clarke S. Growing up with bilateral hippocampal atrophy: From childhood to teenage. *Cortex.* 2011;47(8):931-944.
30. Geva S, Jentschke S, Argyropoulos GPD, Chong WK, Gadian DG, Vargha-Khadem F. Volume reduction of caudate nucleus is associated with movement coordination deficits in patients with hippocampal atrophy due to perinatal hypoxia-ischaemia. *Neuroimage Clin.* 2020;28:102429.
31. Dzieciol AM, Bachevalier J, Saleem KS, et al. Hippocampal and diencephalic pathology in developmental amnesia. *Cortex.* 2017;86:33-44.
32. Kumar R, Lee K, MacEy PM, Woo MA, Harper RM. Mammillary body and fornix injury in congenital central hypoventilation syndrome. *Pediatric Research.* 2009;66(4):429-434.

33. Cabrera-Mino C, Roy B, Woo MA, et al. Reduced brain mammillary body volumes and memory deficits in adolescents who have undergone the Fontan procedure. *Pediatric Research*. 2020;87(1):169-175.
34. Singh S, Roy B, Pike N, et al. Altered brain diffusion tensor imaging indices in adolescents with the Fontan palliation. *Neuroradiology*. 2019;61(7):811-824.
35. Muller HL, Gebhardt U, Teske C, et al. Post-operative hypothalamic lesions and obesity in childhood craniopharyngioma: results of the multinational prospective trial KRANIOPHARYNGEOM 2000 after 3-year follow-up. *Eur J Endocrinol*. 2011;165(1):17-24.
36. Freeman JL, Coleman LT, Wellard RM, et al. MR imaging and spectroscopic study of epileptogenic hypothalamic hamartomas: analysis of 72 cases. *AJNR American journal of neuroradiology*. 2004;25(3):450-462.
37. Vanslambrouck K, Allegaert K, Goemans N, Demaerel P. Symptomatic unilateral dolicho-ectasia of the intracranial arteries in a child. *Eur Radiol*. 2000;10(5):759-760.
38. Roth CL, Eslamy H, Werny D, et al. Semiquantitative analysis of hypothalamic damage on MRI predicts risk for hypothalamic obesity. *Obesity*. 2015;23(6):1226-1233.
39. Perez FA, Elfers C, Yanovski JA, Shoemaker AH, Abuzzahab MJ, Roth CL. MRI measures of hypothalamic injury are associated with glucagon-like peptide-1 receptor agonist treatment response in people with hypothalamic obesity. *Diabetes Obes Metab*. 2021;23(7):1532-1541.
40. Ozyurt J, Thiel CM, Lorenzen A, et al. Neuropsychological outcome in patients with childhood craniopharyngioma and hypothalamic involvement. *The Journal of pediatrics*. 2014;164(4):876-881 e874.
41. Mortini P, Gagliardi F, Bailo M, et al. Magnetic resonance imaging as predictor of functional outcome in craniopharyngiomas. *Endocrine*. 2016;51(1):148-162.
42. Gonçalves LF, Debelenko LV, Bhambhani KJ, Scheid A, Altinok D. Histiocytic necrotizing lymphadenitis (Kikuchi-Fujimoto disease) with CNS involvement in a child. *Pediatric Radiology*. 2014;44(2):234-238.
43. Poloni CB, Ferey S, Haenggeli CA, et al. Alexander disease: Early presence of cerebral MRI criteria. *European Journal of Paediatric Neurology*. 2009;13(6):556-558.
44. Shah S, Khan N, Lakshmanan R, Lewis B, Nagarajan L. Biotinidase deficiency presenting as Neuromyelitis Optica Spectrum Disorder. *Brain Dev*. 2020;42(10):762-766.
45. Friederich MW, Elias AF, Kuster A, et al. Pathogenic variants in SQOR encoding sulfide:quinone oxidoreductase are a potentially treatable cause of Leigh disease. *J Inherit Metab Dis*. 2020.
46. Inui K, Akagi M, Nishigaki T, Muramatsu T, Tsukamoto H, Okada S. A case of chronic infantile type of fucosidosis: clinical and magnetic resonance image findings. *Brain Dev*. 2000;22(1):47-49.
47. Oikawa H, Sasaki M, Tamakawa Y, Kamei A. The circuit of Papez in mesial temporal sclerosis: MRI. *Neuroradiology*. 2001;43(3):205-210.
48. Tschampa HJ, Greschus S, Sassen R, Bien CG, Urbach H. Thalamus lesions in chronic and acute seizure disorders. *Neuroradiology*. 2011;53(4):245-254.
49. Kodama F, Ogawa T, Sugihara S, et al. Transneuronal degeneration in patients with temporal lobe epilepsy: Evaluation by MR imaging. *Eur Radiol*. 2003;13(9):2180-2185.

50. Urbach H, Siebenhaar G, Koenig R, et al. Limbic system abnormalities associated with Ammon's horn sclerosis do not alter seizure outcome after amygdalohippocampectomy. *Epilepsia*. 2005;46(4):549-555.
51. Ferreira NF, De Oliveira V, Amaral L, Mendonça R, Lima SS. Analysis of parahippocampal gyrus in 115 patients with hippocampal sclerosis. *Arquivos de Neuro-Psiquiatria*. 2003;61(3 B):707-711.
52. Mamourian AC, Brown DB. Asymmetric mamillary bodies: MR identification. *AJNR American journal of neuroradiology*. 1993;14(6):1332-1335; discussion 1336-1342.
53. Ng SE, Lau TN, Hui FK, et al. MRI of the fornix and mamillary body in temporal lobe epilepsy. *Neuroradiology*. 1997;39(8):551-555.
54. Ozturk A, Yousem DM, Mahmood A, El Sayed S. Prevalence of asymmetry of mamillary body and fornix size on MR imaging. *AJNR American journal of neuroradiology*. 2008;29(2):384-387.
55. Hakyemez B, Yucel K, Yildirim N, Erdogan C, Bora I, Parlak M. Morphologic and volumetric analysis of amygdala, hippocampus, fornix and mamillary body with MRI in patients with temporal lobe epilepsy. *Neuroradiology Journal*. 2006;19(3):289-296.
56. Kim JH, Tien RD, Felsberg GJ, Osumi AK, Lee N. Clinical significance of asymmetry of the fornix and mamillary body on MR in hippocampal sclerosis. *AJNR American journal of neuroradiology*. 1995;16(3):509-515.
57. Kuzniecky R, Bilir E, Gilliam F, Faught E, Martin R, Hugg J. Quantitative MRI in temporal lobe epilepsy: evidence for fornix atrophy. *Neurology*. 1999;53(3):496-501.
58. Grewal SS, Gupta V, Vibhute P, Shih JJ, Tatum WO, Wharen RE. Mammillary body changes and seizure outcome after laser interstitial thermal therapy of the mesial temporal lobe. *Epilepsy Research*. 2018;141:19-22.
59. Ciesielski KT, Lesnik PG, Benzel EC, Hart BL, Sanders JA. MRI morphometry of mamillary bodies, caudate nuclei, and prefrontal cortices after chemotherapy for childhood leukemia: Multivariate models of early and late developing memory subsystems. *Behav Neurosci*. 1999;113(3):439-450.
60. Kwan BYM, Krings T, Bernstein M, Mandell DM. A novel mechanism of toxic injury to the Papez circuit from chemotherapy. *Journal of Clinical Neuroscience*. 2015;22(4):760-762.
61. Anand G, Visagan R, Chandratre S, et al. H1N1 triggered recurrent acute necrotizing encephalopathy in a family with a T653I mutation in the RANBP2 gene. *Pediatr Infect Dis J*. 2015;34(3):318-320.
62. Herebian D, Alhaddad B, Seibt A, et al. Coexisting variants in OSTM1 and MANEAL cause a complex neurodegenerative disorder with NBIA-like brain abnormalities. *Europ J Hum Genet*. 2017;25(9):1092-1095.
63. Assis ZA, Sevic R. Association of Transsynaptic Degeneration of the Papez Circuit with Anterior Thalamic Encephalomalacia. *JAMA Neurology*. 2018;75(11):1437-1438.
